1 **Testing the association between tobacco and cannabis use and cognitive functioning:**

2 **Findings from an observational and Mendelian randomization study**

3

4 Liam Mahedy<sup>1,2,3</sup> (Ph.D.), Robyn Wootton<sup>1,2,3</sup> (Ph.D.), Steph Suddell<sup>1,2,3</sup> (MSc), Caroline

5 Skirrow<sup>1,4</sup>, (Ph.D.), Matt Field<sup>5</sup> (Ph.D.), Jon Heron<sup>6</sup> (Ph.D.), Matthew Hickman<sup>6</sup> (Ph.D.),

6 Marcus R. Munafò<sup>1,2,3</sup> (Ph.D.)

7

8 **Affiliations**

9 <sup>1</sup>School of Psychological Science, University of Bristol, Bristol, UK.

10 <sup>2</sup>MRC Integrative Epidemiology Unit, University of Bristol, Bristol, UK.

11 <sup>3</sup>National Institute for Health Research Biomedical Research Centre at the University

12 Hospitals Bristol NHS Foundation Trust and the University of Bristol, Bristol, UK.

13 <sup>4</sup>Cambridge Cognition, Cambridge, UK.

14 <sup>5</sup>Department of Psychology, University of Sheffield, Sheffield, UK.

15 <sup>6</sup>Population Health Sciences, Bristol Medical School, University of Bristol, Bristol, UK

16

17 **Corresponding author:** Liam Mahedy, School of Psychological Science, University of Bristol,

18 12a Priory Road, Bristol, UK, BS8 1TU.

19 Tel: +44 (0) 117 33 10616; Email: [liam.mahedy@bristol.ac.uk](mailto:liam.mahedy@bristol.ac.uk)

20

21 **Key words:** ALSPAC, cannabis, tobacco, cognition, longitudinal latent class analysis,

22 Mendelian randomization.

23

24 **Word count:** 4,032 (excluding Abstract, Figures, Tables and References) used to guide clinical practice.

25 **Abstract**

26 **Background:** Although studies have examined the association between tobacco and  
27 cannabis use in adolescence with subsequent cognitive functioning, study designs are  
28 usually not able to distinguish correlation from causation.

29 **Methods:** First, separate patterns of tobacco and cannabis use were derived using  
30 longitudinal latent class analysis based on measures assessed on five occasions from ages 13  
31 to 18 years in a large UK based population cohort (ALSPAC). Cognitive functioning measures  
32 comprised working memory, response inhibition, and emotion recognition assessed at 24  
33 years of age. One- and two-sample Mendelian randomization, methods for testing causal  
34 inference using genetic variants as proxies for an exposure of interest, were used to  
35 examine the causal relationship between smoking initiation/lifetime cannabis use, and  
36 subsequent cognitive functioning in ALSPAC.

37 **Results:** We found evidence of a relationship between tobacco and cannabis use and  
38 diminished cognitive functioning for each of the outcomes in the observational analyses.  
39 The clearest evidence demonstrated a dose-response relationship between tobacco use and  
40 working memory suggesting late-onset regular tobacco smokers ( $b=-0.29$ , 95%CI=-0.45 to -  
41 0.13), early-onset regular smokers ( $b=-0.45$ , 95%CI=-0.84 to -0.05), and early-onset regular  
42 cannabis users ( $b=-0.62$ , 95%CI=-0.93 to -0.31) performed worse on this task compared to  
43 individuals with a very low probability of using tobacco/cannabis. Mendelian randomization  
44 analyses were imprecise and did not provide additional support for these results.

45 **Conclusions:** Overall, there was some evidence to suggest that adolescent tobacco and  
46 cannabis use were associated with diminished cognitive functioning. Better powered  
47 genetic studies are required to determine whether these associations are causal.

48

## 49 INTRODUCTION

50 Tobacco and cannabis use during adolescence, when the brain is still developing and  
51 undergoing considerable structural and function changes (1), is a major public health  
52 concern. The association between adolescent tobacco and cannabis use and subsequent  
53 cognitive functioning has received particular attention because certain cognitive functions  
54 (e.g. working memory, response inhibition, and emotion recognition) do not peak until early  
55 adulthood (2–5) in parallel with maturation of the prefrontal cortex (6,7). Due to the  
56 prolonged neurodevelopmental period and the potential for the endocannabinoid and  
57 nicotinic cholinergic signalling systems to be involved in altering development (8,9), it is  
58 plausible that tobacco and cannabis use during this potentially critical period could play a  
59 role in disrupting normal brain development (10–13). Nonetheless, there is still uncertainty  
60 regarding the nature of the association between tobacco and cannabis use and  
61 neurocognitive function.

62 A recent review of prospective studies of the association between cannabis use and  
63 cognition in young people (14) highlighted an association between cannabis use and  
64 neuropsychological decline (15,16). However, these studies often fail to control for  
65 neurocognitive measures prior to cannabis use (17,18) and associations were largely found  
66 for the heaviest cannabis users and were often attenuated when potential confounders (e.g.  
67 other forms of substance use) were included (16,19). A recent study (20), using a co-twin  
68 design (allowing for the disentanglement of shared environmental and genetic factors),  
69 assessed IQ prior to cannabis initiation and found insufficient evidence to suggest cannabis  
70 use was associated with decline in general IQ. Findings from two recent longitudinal studies  
71 of adolescents (21,22) using a repeated measures design suggest that the association  
72 between cognitive functioning and cannabis use could be bidirectional.

73           The direction of association between tobacco and cognitive functioning is also  
74 unclear as there is a lack of epidemiological studies that have prospectively examined this  
75 relationship. Evidence from animal studies suggests that nicotine exposure may have more  
76 deleterious developmental effects during adolescence, when the brain is thought to be  
77 more vulnerable (23). Furthermore, human studies suggest that nicotine has a more potent  
78 effect when consumed in late adolescence compared to in adulthood (24). One small  
79 prospective study ( $n=112$ , aged between 17 to 21 years) found that current smokers  
80 performed worse than non-smokers on a variety of cognitive assessments including  
81 language related IQ and working memory while controlling for earlier cognitive measures  
82 and other substance use (25). Finally, one large study ( $n\sim 20,000$ ) on Israeli male soldiers  
83 (26) found a dose-response relationship between number of cigarettes smoked and lower  
84 general cognitive ability compared to non-smokers. They also found diminished cognitive  
85 functioning in individuals who started starting smoking after 18 years of age.

86           In an effort to strengthen the evidence, we used data from the Avon Longitudinal  
87 Study of Parents and Children, a large UK prospective birth cohort, to investigate whether  
88 patterns of adolescent tobacco and cannabis use were prospectively associated with  
89 cognitive functioning at 24 years of age. As young people do not initiate tobacco or cannabis  
90 at the same time (27,28), we used longitudinal latent class analysis (LLCA) to identify  
91 heterogenous classes of individuals with different tobacco and cannabis use profiles across  
92 adolescence (29). As a next step we used genetic variants that are separately associated  
93 with smoking initiation and lifetime cannabis use to perform one- and two-sample  
94 Mendelian randomization (MR) to improve causal inference (30). We expected to find that  
95 an earlier age of onset and more frequent use (for both substances) would be associated  
96 with larger reductions in cognitive function, and that the MR analyses would demonstrate

97 the hypothesised associations between tobacco and cannabis use and diminished cognitive  
98 functioning.

99

## 100 **METHODS**

### 101 **Observational analyses**

#### 102 *Participants and Procedure*

103 The Avon Longitudinal Study of Parents and Children (ALSPAC) is a cohort born in 1991–92.  
104 ALSPAC recruited 14,541 pregnant women resident in Avon, UK, with expected dates of  
105 delivery between 1 April 1991 and 31 December 1992. The initial number of pregnancies  
106 enrolled is 14,541 (for these at least one questionnaire has been returned or a “Children in  
107 Focus” clinic had been attended by 19/07/99). Of these initial pregnancies, there was a total  
108 of 14,676 fetuses, resulting in 14,062 live births and 13,988 children who were alive at 1  
109 year of age. When the oldest children were approximately 7 years of age, an attempt was  
110 made to bolster the initial sample with eligible cases who had failed to join the study  
111 originally. The total sample size for analyses using any data collected after the age of 7 years  
112 is therefore 15,454 pregnancies, resulting in 15,589 fetuses. Of this total sample 14,901  
113 were alive at 1 year of age (31–33). Of these, 9,997 offspring were invited to attend the 24-  
114 year clinic assessment. A detailed overview of our study population, including attrition at  
115 the different measurement occasions is presented in Supplementary Material Figure S1.  
116 Detailed information about ALSPAC is available online [www.bris.ac.uk/alspac](http://www.bris.ac.uk/alspac). A fully  
117 searchable data dictionary is available on the study’s website  
118 <http://www.bristol.ac.uk/alspac/researchers/our-data/>. Approval for the study was  
119 obtained from the ALSPAC Ethics and Law Committee and the Local Research Ethics  
120 Committees. Informed consent for the use of data collected via questionnaires and clinics

121 was obtained from participants following recommendations of the ALSPAC Ethics and Law  
122 Committee at the time. Consent for biological samples was collected in accordance with the  
123 Human Tissue Act (2004).

## 124 **Measures**

125 A timeline of data collection is presented in Supplementary Material Figure S2.

### 126 *Exposure variables*

127 Information on tobacco and cannabis use were collected on six occasions via  
128 questionnaire (Q) or during attendance at a study clinic (C). Median ages at response were:  
129 13y(C), 14y(Q), 15y(C) 16y(Q), 17y(C), and 18y(Q).

### 130 *Tobacco use*

131 Patterns of tobacco use have been described in detail elsewhere (34). Responses to  
132 one or more questions at each time point were used to derive a repeated four-level ordinal  
133 variable with categories 'Non-smoker', 'Occasional smoker' (typically less than once per  
134 week), 'Weekly smoker' and 'Daily smoker'. There was good agreement that a four-class  
135 solution was adequate in explaining the heterogeneity in tobacco based on model fit criteria  
136 (see Table S1a). The four-class model ( $n=8,525$ ) comprised individuals with a higher  
137 probability of 'early-onset regular smokers' (3.4%), 'late-onset regular smokers' (11.6%),  
138 'experimenters' (17.4%), and 'non-smokers' (67.5%) (Figure 1a).

### 139 *Cannabis use*

140 Patterns of cannabis use have been described in detail elsewhere (35). Responses to  
141 one or more questions at each time point were used to derive a repeated three-level ordinal  
142 variable with categories 'Do not use', 'Occasional use' (typically less than once per week)  
143 and 'Frequent use' (typically once per week or more). There was good agreement that a  
144 four-class solution was adequate in explaining the heterogeneity in cannabis use based on

145 model fit criteria (see Table S1b). The four-class model ( $n=8,093$ ) comprised individuals with  
146 a higher probability of ‘early-onset regular users’ (3.6%), ‘early-onset occasional users’  
147 (2.9%), ‘late-onset occasional users’ (13.8%), and ‘non-users’ (79.8%) (Figure 1b).

#### 148 *Outcome variables*

149 At 24 years of age ( $M=24.0$  years;  $SD=9.8$  months) participants attended a clinic-  
150 based assessment which included computerised cognitive assessments as part of a broader  
151 assessment battery of mental and physical health and behaviour. Data collection for the  
152 online questionnaires was collected and managed by REDcap electronic data capture tools  
153 (36,37). Further information on all three cognitive tasks is presented in Supplementary  
154 material.

#### 155 *Working memory*

156 The  $N$ -back task (2-back condition) was used to assess working memory. The  $N$ -back  
157 task (38) is widely used to measure working memory (39–41). A measure of discriminability  
158 ( $d'$ ) was chosen as the primary outcome measure given it is an overall performance  
159 estimate. High scores on *number of hits* indicated more accurate identification, while high  
160 scores on *false alarms* indicated less accurate identification. High scores on  $d'$ , therefore,  
161 indicated a greater ability to distinguish signal from noise.  $d'$  data were available for  $n=3,242$   
162 participants.

#### 163 *Response inhibition*

164 The Stop Signal Task (42) was used to assess response inhibition – the ability to  
165 prevent an ongoing motor response. The task consisted of 256 trials, which included a 4:1  
166 ratio of trials without stop signals to trials with stop signals. Mean response times were  
167 calculated. An estimate of *stop signal reaction time* (SSRT) was calculated using the median  
168 of the inhibition function approach (43). SSRT used as the primary outcome as it is a reliable

169 measure of inhibitory control, with shorter reaction times indicating faster inhibition. SSRT  
170 data were available for 3,201 participants.

### 171 *Emotion recognition*

172 Emotion recognition was assessed using a six alternative forced choice (6AFC)  
173 emotion recognition task (44) comprising of 96 trials (16 for each emotion) which measures  
174 the ability to identify emotions in facial expressions that vary in intensity. In each trial,  
175 participants were presented with a face displaying one of six emotions: anger, disgust, fear,  
176 happiness, sadness, or surprise. Participants were required to select the descriptor that best  
177 described the emotion that was present in the face, using the computer mouse. Emotion  
178 intensity varied across 8 levels within each emotion from the prototypical emotion to an  
179 almost neutral face. Each individual stimulus was presented twice, giving a total of 96 trials.  
180 An overall measure of ER (the number of facial emotions accurately identified) was used as  
181 the primary outcome. ER data were available for  $n=3,368$  participants.

### 182 *Potential confounders*

183 Confounders comprised of established risk factors for cognitive functioning that  
184 could plausibly have a relationship with earlier substance use. Potential confounders  
185 included: income, maternal education, socioeconomic position, housing tenure, sex, and  
186 maternal smoking during first trimester in pregnancy. Working memory at approximately 11  
187 years and experience of a head injury/unconsciousness up to 11 years were included to  
188 control for cognitive functioning prior to baseline measures of substance use. The inclusion  
189 of both measures helps to control for the possibility that the onset of substance use is  
190 caused by impaired or lower cognitive performance, thereby allowing for the temporal  
191 order between substance use and later cognitive functioning to be established. Finally, a  
192 measure of alcohol use asking whether they had ever had a whole drink of alcohol was



193 collected at age 13 years (up to the first assessment of smoking and cannabis use). Further  
194 information is presented in Supplementary material.

#### 195 *Statistical methods*

196 Different tobacco and cannabis phenotypes were used across different analytic  
197 methods.

#### 198 *Observational analyses*

199 Tobacco and cannabis class membership was related to covariates using the Bolck-  
200 Croon-Hagenaars (45) method. This approach uses the weights derived from the latent  
201 classes to reflect measurement error in the latent class variable. Linear regression was used  
202 to examine the association between the cognitive outcomes and latent class membership  
203 controlling for the confounding variables. Results are reported as unstandardized beta  
204 coefficients with 95% confidence intervals. Analyses were carried out using Mplus 8.4 (46).

#### 205 *Missing data*

206 Missing data was dealt with in three steps. First, full information maximum  
207 likelihood (FIML) was used to derive trajectories tobacco (N=8,525) and cannabis (N=8,093)  
208 based on individuals who had information on at least one timepoint between 13 and 18  
209 years. For a detailed description of missingness at each timepoint see Tables S2a and S2b.  
210 Next, multiple imputation was based on 3,232 participants (for both tobacco and cannabis  
211 models) who had information on at least one of the cognitive outcomes. The imputation  
212 model (based on 100 datasets) contained performance on all of the cognitive tasks, all  
213 measures of tobacco and cannabis use, and potential confounding variables, as well as a  
214 number of auxiliary variables known to be related to missingness (e.g., substance use in  
215 early adolescence, parental financial difficulties, and other SES variables). Finally, inverse  
216 probability weighting was used where estimates of prevalence and associations were

217 weighted to account for probabilities of non-response to attending the clinic. See Table S3  
218 for a detailed description of attrition for completing the cognitive assessments at age 24  
219 years. See Tables S4a and S4b for a detailed description of confounding factors associated  
220 with tobacco and cannabis use class membership.

221 *Genetic analyses*

222 *Mendelian randomization (MR)*

223 Two-sample MR was used to test the hypothesised causal effect of smoking initiation  
224 and lifetime cannabis use on cognitive functioning. The two-sample MR approach requires  
225 summary level data from GWAS, enabling SNP-outcome and SNP-exposure effects to be  
226 derived from different data sources. As the genetic instrument for smoking we used 378-  
227 independent genome-wide significant SNPs associated with smoking initiation identified by  
228 the GWAS & Sequencing Consortium of Alcohol and Nicotine use (GSCAN  
229 <https://gscan.sph.umich.edu/>) based on a total sample of ~1,200,000 individuals. We used  
230 8-independent genome-wide significant SNPs associated with lifetime cannabis use based  
231 on the largest GWAS to date ( $n=184,765$ ) (47). As outcomes, we used GWAS conducted in  
232 ALSPAC ( $n\sim 2,500$ ) for each of our three primary outcome measures: i) working memory  
233 assessed using  $d'$ ; ii) response inhibition assessed using SSRT; and iii) emotion recognition  
234 assessed using total number of correctly identified emotions (48).

235 Analyses were performed using the TwoSampleMR R package, part of MR-Base  
236 (49). The inverse-variance weighted (IVW) approach was used as a primary analysis, with  
237 three complementary estimation methods as sensitivity analyses which each make different  
238 assumptions about the nature of horizontal pleiotropy (where the genetic variant associates  
239 with the outcome via an independent pathway to the exposure): MR Egger (50), weighted

240 median (51), and weighted mode (52). A consistent effect across all of these methods would  
241 provide the most confidence that any observed effects are not due to pleiotropy.

242           Next, one-sample MR analyses using two-stage least squares (2SLS) regression  
243 models with robust standard errors was used to examine the full GRS for smoking initiation  
244 (378 SNPs) as an instrument for smoking initiation and cannabis use (8 SNPs) as an  
245 instrument for lifetime cannabis use in relation to the three cognitive assessments at 24  
246 years of age. Using individual-level data, the first stage involves regressing tobacco/cannabis  
247 use upon individual smoking initiation/lifetime cannabis use SNPs. Lifetime tobacco use  
248 (n=1,638/5,107) (32%) up to age 15 years and lifetime cannabis use (n=1,348/5,319) (25%)  
249 up to age 24 years were chosen as exposures. Each of the cognitive outcomes were then  
250 regressed on the fitted values from the stage 1 for tobacco and cannabis use in the second  
251 stage. The three key assumptions in MR are 1) the genetic instrument is robustly associated  
252 with the exposure of interest; 2) confounders of the exposure-outcome association are not  
253 associated with the genetic instrument; and 3) the genetic instrument is not associated with  
254 the outcome other than through its association with the exposure; see (30) for a full  
255 description. Power calculations conducted for one-sample MR analyses using mRnd (53)  
256 indicated that we had 80% power to detect an effect size of 0.24 for smoking initiation and  
257 0.15 for lifetime cannabis use using a sample size of n~3,300 (individuals who had available  
258 cognitive data in ALSPAC).

259

## 260 **RESULTS**

261 *Observational analyses*

262 *Working memory – 2-back task*

263 Unadjusted and adjusted associations between patterns of tobacco/cannabis use  
264 from 13 to 18 years and working memory at age 24 are presented in Tables 1a and 1b.  
265 There was evidence to suggest that late-onset regular smokers ( $b=-0.29$ , 95%CI=-0.45 to -  
266 0.13) and earl-onset regular smokers ( $b=-0.45$ , 95%CI=-0.84 to -0.05) showed poorer  
267 working memory performance compared to the non-smokers in the fully adjusted model.  
268 There was also evidence indicating that early-onset regular cannabis users showed poorer  
269 working memory performance compared to the non-cannabis users in the fully adjusted  
270 model ( $b=-0.62$ , 95%CI=-0.93 to -0.31). In the sensitivity analyses, there was some evidence  
271 to suggest that early-onset regular tobacco smoking was associated with fewer correct hits  
272 on the N-back task in the fully adjusted models (Table S5a).

273 [Tables 1a and 1b]

274 *Response inhibition - stop signal task*

275 Unadjusted and adjusted associations between patterns of tobacco/cannabis use  
276 from 13 to 18 years and response inhibition at age 24 are presented in Tables 2a and 2b.  
277 The fully adjusted models suggest slower SSRT (indicative of impaired response inhibition) in  
278 early-onset regular smokers ( $b=0.18$ , 95%CI=0.07 to 0.28), and early-onset regular cannabis  
279 users ( $b=0.30$ , 95%CI=0.08 to 0.52) compared to tobacco and cannabis non-users. All  
280 associations were supported by significant Wald test values indicating a significant  
281 difference between the groups in terms of their ability to inhibit responses. In the sensitivity  
282 analyses, there was evidence to suggest that late-onset regular tobacco and early-onset  
283 cannabis users were associated with worse Go and Stop accuracy in the fully adjusted  
284 models (Tables S6a and S6b).

285 [Tables 2a and 2b]

286 *Emotion recognition – 6AFC task*

287 Unadjusted and adjusted associations between patterns of tobacco/cannabis use  
288 from 13 to 18 years and emotion recognition at age 24 are presented in Tables 3a and 3b.  
289 There was evidence to suggest that late-onset regular smokers ( $b=-0.02$ , 95%CI=-0.03 to -  
290 0.00), and early-onset regular ( $b=-0.04$ , 95%CI=-0.08 to -0.01) showed poorer emotion  
291 recognition compared to non-smokers in the fully adjusted models. There was insufficient  
292 evidence of an association between other patterns of tobacco/cannabis use and emotion  
293 recognition. There was some evidence in the sensitivity models to suggest late-onset regular  
294 tobacco users had poorer ability to identify ‘fear’ and ‘surprise’, while early-onset regular  
295 tobacco users had poorer ability to identify ‘sad’ in the fully adjusted models (Table S7d).  
296 Early- and late-onset occasional cannabis users had better ability to identify ‘anger’ and  
297 ‘disgust’, while late-onset occasional cannabis users had poorer ability to identify ‘happy’ in  
298 the fully adjusted models (Table 8d).

299 [Tables 3a and 3b]

### 300 *Genetic analyses*

301 Information testing whether the genetic instruments are associated with the confounders  
302 are presented in the Supplementary Material (Tables S9a and S9b).

### 303 *Two-sample Mendelian randomization*

304 Two-sample MR methods provided little evidence to suggest that SNPs associated  
305 with smoking initiation were a causal risk factor for deficits in cognitive functioning (Table  
306 S4a). Focusing on the IVW estimate as the primary measure, SNPs associated with smoking  
307 initiation were not associated with working memory ( $b=-0.02$  95%CI=-0.20 to 0.15;  $p=0.52$ );  
308 response inhibition ( $b=-0.06$  95%CI=-0.24 to 0.12;  $p=0.31$ ); or emotion recognition ( $b=0.00$   
309 95%CI=-0.18 to 0.18;  $p=0.97$ ). Other sensitivity estimates tended to be in the same direction

310 and failed to demonstrate smoking initiation as a causal risk factor for deficits in cognitive  
311 functioning.

312 Similarly, there was little evidence to suggest that SNPs associated with lifetime  
313 cannabis use was a causal risk factor for deficits in cognitive functioning (Table S4b).  
314 Focusing on the IVW estimate as the primary measure, SNPs associated with lifetime  
315 cannabis use were not associated with working memory ( $b=0.28$  95%CI=-0.16 to 0.70;  
316  $p=0.21$ ); response inhibition ( $b=-0.13$  95%CI=-0.47 to 0.22;  $p=0.47$ ); or emotion recognition  
317 ( $b=-0.08$  95%CI=-0.52 to 0.36;  $p=0.71$ ). All other sensitivity estimates were in the same  
318 direction and failed to demonstrate cannabis use as a causal risk factor for deficits in  
319 cognitive functioning.

320 [Tables 4a and 4b]

#### 321 *One-sample Mendelian randomization*

322 Results from the one-sample MR provided little evidence to suggest that smoking  
323 initiation or lifetime cannabis use were causal risk factors for deficits in cognitive functioning  
324 (Table 5). SNPs associated with smoking initiation were not associated with working  
325 memory ( $b=0.01$  95%CI=-0.06 to 0.29;  $p=0.21$ ); response inhibition ( $b=0.16$  95%CI=-0.03 to  
326 0.35;  $p=0.10$ ); or emotion recognition ( $b=0.00$  95%CI=-0.18 to 0.18;  $p=0.97$ ). Similarly, SNPs  
327 associated with lifetime cannabis use were not associated with working memory ( $b=-0.37$   
328 95%CI=-0.72 to -0.02;  $p=0.04$ ); response inhibition ( $b=0.04$  95%CI=-0.32 to 0.39;  $p=0.85$ ); or  
329 emotion recognition ( $b=-0.08$  95%CI=-0.52 to 0.36;  $p=0.71$ ).

330 [Table 5]

331

## 332 **DISCUSSION**

333           This observational study provided evidence to suggest an association between  
334 tobacco and cannabis use across adolescence and cognitive functioning at age 24. Late-  
335 onset regular smokers and early-onset regular cannabis users had poorer working memory  
336 performance, slower ability to inhibit responses, and poorer ability to recognise emotions  
337 compared to the non-smokers and non-cannabis users. Our results remained largely  
338 consistent when controlling for prior measures of substance use and cognition allowing for  
339 clear temporality between exposure and outcomes. Genetic analyses were imprecise and  
340 did not provide clear evidence to suggest that smoking initiation and lifetime cannabis use  
341 were causally related to cognitive functioning in the ALSPAC sample. It is likely that these  
342 analyses were underpowered.

#### 343 *Comparison with previous studies*

344           To our knowledge, this is the first study to assess the relationship between tobacco  
345 and cannabis use, and subsequent cognitive functioning using a combination of  
346 observational and genetic epidemiological approaches. Overall, we found an adverse  
347 associations between tobacco/cannabis use and working memory, response inhibition, and  
348 emotion recognition in ALSPAC, in that those who initiated use at earlier and later ages, and  
349 in those with more frequent use. These findings contribute to a literature of mixed findings  
350 regarding the direction of association between tobacco and cannabis exposure and  
351 subsequent cognition by suggesting that adolescent tobacco and cannabis use precede  
352 observed reductions in cognitive function. These findings support studies that have  
353 demonstrated effects may depend on the frequency, duration, and age at onset of use  
354 (20,21,54–59).

355           Our study extends previous findings in a number of ways. First, the observational  
356 study was better powered than most of the previous studies as it used data from over 3,200

357 participants providing information spanning birth to 24 years of age. Second, identifying  
358 heterogeneous patterns of tobacco and cannabis use across this crucial period allows  
359 individuals who follow markedly different developmental trajectories to be captured  
360 (27,28). Third, the cognitive measures were assessed at a time when they are expected to  
361 have reached maturity (2–5), in comparison to previous studies which have examined  
362 cognitive functioning at earlier ages while they are still maturing. Examining mature levels of  
363 cognitive functioning reduces the possibility that cognitive functioning is influencing earlier  
364 tobacco and cannabis use, effects that cannot be disentangled in purely cross-sectional  
365 studies. Further, our ability to control for earlier measures of cognitive functioning and  
366 substance use, prior to the baseline measures of tobacco and cannabis use helps to rule out  
367 the possibility of reverse causation. Fourth, our study sought to examine specificity in  
368 cognitive functioning, by using well-validated tests to probe different domains of cognitive  
369 functioning instead of focusing on general intelligence. Finally, we sought to triangulate our  
370 results by using one- and two-sample MR approaches to assess tobacco and cannabis use as  
371 causal risk factors for cognitive functioning. This approach can help to overcome the main  
372 sources of bias from classical observational approaches, by providing a more reliable  
373 estimate of the likely underlying causal relationship.

#### 374 *Limitations*

375         There are limitations to this study that should be considered. First, the ALSPAC  
376 cohort suffers from attrition, which is higher among the socially disadvantaged (60). We  
377 attempted to minimize the effect of drop-out by using multiple imputation, FIML, and  
378 inverse probability weighting which assume MAR missing patterns. Although it is not  
379 possible to test the MAR assumption, it was made more plausible as a number of SES  
380 variables were found to predict whether participants attended the clinic or not (Table S1).



381 Second, tobacco and cannabis use were self-reported. However, there is evidence to  
382 suggest that self-reported assessments are reliable and valid methods (61), and the  
383 assessment of tobacco and cannabis use yearly over 6 years in a latent variable framework  
384 helps to account for measurement error (62). Third, it is likely that both the one- and two-  
385 sample MR analyses are underpowered. However, findings using weak instruments tend to  
386 bias findings towards the null in the two-sample setting and toward the outcome-risk  
387 association in the one-sample setting (63). Finally, it is possible that the direction of the  
388 association could work in both ways, that is, impairments in cognitive functioning may  
389 precede (and increase the risk of developing) tobacco and cannabis use (21,64–66). We  
390 were able to include a number of measures to maximize the robustness of our findings: (i)  
391 ascertaining the temporal order of exposures and outcomes; (ii) controlling for premorbid  
392 working memory and brain insults prior to measures of tobacco/cannabis use helped to  
393 reduce the possibility of cognitive impairments, or lower cognitive abilities in childhood,  
394 influencing tobacco/cannabis use; and (iii) it is possible that a common risk factor is  
395 influencing both tobacco/cannabis use and lower cognitive function, however MR methods  
396 helps to protect against this possibility by minimizing bias from reverse causation and  
397 residual confounding.

### 398 *Implications and conclusions*

399 Using a triangulation approach of three separate methods, each with different  
400 limitations and potential sources of bias, our study contributes to the understanding of the  
401 relationship between adolescent tobacco and cannabis use, and subsequent cognitive  
402 functioning. Overall, there was observational evidence that adolescent tobacco and  
403 cannabis use were associated with subsequent cognitive functioning, highlighting  
404 impairments in a range of cognitive domains, including working memory, response

405 inhibition and emotion recognition. Our findings lend support to the developmental  
406 vulnerability hypothesis, in that, tobacco and cannabis use in adolescence, when the brain is  
407 undergoing critical development, may have neurotoxic effects. Better powered genetically  
408 informed studies are required to determine whether these associations are causal.

409

410 **Acknowledgements:** We are extremely grateful to all the families who took part in this  
411 study, the midwives for their help in recruiting them, and the whole ALSPAC team, which  
412 includes interviewers, computer and laboratory technicians, clerical workers, research  
413 scientists, volunteers, managers, receptionists and nurses. The work was undertaken with  
414 the support of the MRC and Alcohol Research UK (grant number MR/L022206/1). We  
415 acknowledge also support from The Centre for the Development and Evaluation of Complex  
416 Interventions for Public Health Improvement (DECIPHER); a UKCRC Public Health Research  
417 Centre of Excellence (joint funding (grant number MR/KO232331/1) from the British Heart  
418 Foundation, Cancer Research UK, Economic and Social Research Council, Medical Research  
419 Council, the Welsh Government and the Wellcome Trust, under the auspices of the UK  
420 Clinical Research Collaboration); and the NIHR School of Public Health Research. Support  
421 was also provided by the UK Medical Research Council Integrative Epidemiology Unit at the  
422 University of Bristol (MM\_UU\_00011/7). LM, RW, SS, and MRM are members of the UK  
423 Centre for Tobacco and Alcohol Studies, a UKCRC Public Health Research Centre of  
424 Excellence. LM, REW, SS, and MRM are supported by the NIHR Biomedical Research Centre  
425 at the University Hospitals Bristol NHS Foundation Trust and the University of Bristol (BRC-  
426 1215-20011) and we acknowledge support from NIHR HPRU in Evaluation. The UK Medical  
427 Research Council and Wellcome (Grant ref: 102215/2/13/2) and the University of Bristol  
428 provide core support for ALSPAC. This publication is the work of the authors and Liam

429 Mahedy and Marcus Munafò will serve as guarantors for the contents of this paper. The  
430 views expressed in this publication are those of the authors and not necessarily those of the  
431 NHS, the National Institute for Health Research or the Department of Health and Social  
432 Care. GWAS data were generated by Sample Logistics and Genotyping Facilities at Wellcome  
433 Sanger Institute and LabCorp (Laboratory Corporation of America) using support from  
434 23andMe. A comprehensive list of grants funding is available on the ALSPAC website  
435 (<http://www.bristol.ac.uk/alspac/external/documents/grant-acknowledgements.pdf>).

436 **Disclosures:** CS is employed by Cambridge Cognition. MRM is co-director of Jericoe Ltd,  
437 which produces software for the assessment and modification of emotion recognition. LM,  
438 RW, SS, MF, JH, & MH report no conflicts of interest.

439

440 REFERENCES

- 441 1. De Bellis MD, Clark DB, Beers SR, Soloff PH, Boring AM, Hall J, et al. Hippocampal  
442 volume in adolescent-onset alcohol use disorders. *Am J Psychiatry*. 2000;157(5):737–  
443 44.
- 444 2. Fry AF, Hale S. Relationships among processing speed, working memory, and fluid  
445 intelligence in children. *Biol Psychol*. 2000;54(1–3):1–34.
- 446 3. Kramer AF, de Sather JCMG, Cassavaugh ND. Development of attentional and  
447 oculomotor control. *Dev Psychol*. 2005;41(5):760–72.
- 448 4. Davidson MC, Amso D, Anderson LC, Diamond A. Development of cognitive control  
449 and executive functions from 4 to 13 years: evidence from manipulations of memory,  
450 inhibition, and task switching. *Neuropsychologia*. 2006;44(11):2037–78.
- 451 5. Thomas LA, De Bellis MD, Graham R, LaBar KS. Development of emotional facial  
452 recognition in late childhood and adolescence. *Dev Sci*. 2007;10(5):547–58.
- 453 6. Sowell ER, Delis D, Stiles J, Jernigan TL. Improved memory functioning and frontal  
454 lobe maturation between childhood and adolescence: a structural MRI study. *J Int  
455 Neuropsychol Soc*. 2001;7(3):312–22.
- 456 7. Sowell ER, Thompson PM, Holmes CJ, Jernigan TL, Toga AW. In vivo evidence for post-  
457 adolescent brain maturation in frontal and striatal regions. *Nat Neurosci*. 1999;2:859.
- 458 8. Galve-Roperh I, Palazuelos J, Aguado T, Guzman M. The endocannabinoid system and  
459 the regulation of neural development: potential implications in psychiatric disorders.  
460 *Eur Arch Psychiatry Clin Neurosci*. 2009;259(7):371–82.
- 461 9. Newman LA, McGaughy J. Cholinergic deafferentation of prefrontal cortex increases  
462 sensitivity to cross-modal distractors during a sustained attention task. *J Neurosci*.  
463 2008;28(10):2642–50.

- 464 10. Jacobus J, Tapert SF. Effects of cannabis on the adolescent brain. *Curr Pharm Des.*  
465 2014;20(13):2186–93.
- 466 11. Rubino T, Parolaro D. Long lasting consequences of cannabis exposure in  
467 adolescence. *Mol Cell Endocrinol.* 2008;286(1-2 Suppl 1):S108-13.
- 468 12. Slotkin TA. Cholinergic systems in brain development and disruption by  
469 neurotoxicants: nicotine, environmental tobacco smoke, organophosphates. *Toxicol*  
470 *Appl Pharmacol.* 2004;198(2):132–51.
- 471 13. Dwyer JB, Broide RS, Leslie FM. Nicotine and brain development. *Birth Defects Res C*  
472 *Embryo Today.* 2008;84(1):30–44.
- 473 14. Gonzalez R, Pacheco-Colón I, Duperrouzel JC, Hawes SW. Does cannabis use cause  
474 declines in neuropsychological functioning? A review of longitudinal studies. *J Int*  
475 *Neuropsychol Soc.* 2017;23(9–10):893–902.
- 476 15. Fried P, Watkinson B, James D, Gray R. Current and former marijuana use: preliminary  
477 findings of a longitudinal study of effects on IQ in young adults. *CMAJ.*  
478 2002;166(7):887–91.
- 479 16. Jackson NJ, Isen JD, Khoddam R, Irons D, Tuvblad C, Iacono WG, et al. Impact of  
480 adolescent marijuana use on intelligence: Results from two longitudinal twin studies.  
481 *Proc Natl Acad Sci U S A.* 2016;113(5):E500-8.
- 482 17. Tait RJ, Mackinnon A, Christensen H. Cannabis use and cognitive function: 8-year  
483 trajectory in a young adult cohort. *Addiction.* 2011;106(12):2195–203.
- 484 18. Jacobus J, Squeglia LM, Meruelo AD, Castro N, Brumback T, Giedd JN, et al. Cortical  
485 thickness in adolescent marijuana and alcohol users: A three-year prospective study  
486 from adolescence to young adulthood. *Dev Cogn Neurosci.* 2015;16:101–9.
- 487 19. Mokrysz C, Landy R, Gage SH, Munafò MR, Roiser JP, Curran H V. Are IQ and

- 488 educational outcomes in teenagers related to their cannabis use? A prospective  
489 cohort study. *J Psychopharmacol*. 2016;30(2):159–68.
- 490 20. Meier MH, Caspi A, Danese A, Fisher HL, Houts R, Arseneault L, et al. Associations  
491 between adolescent cannabis use and neuropsychological decline: a longitudinal co-  
492 twin control study. *Addiction*. 2018;113(2):257–65.
- 493 21. Castellanos-Ryan N, Pingault J-B, Parent S, Vitaro F, Tremblay RE, Seguin JR.  
494 Adolescent cannabis use, change in neurocognitive function, and high-school  
495 graduation: A longitudinal study from early adolescence to young adulthood. *Dev*  
496 *Psychopathol*. 2017;29(4):1253–66.
- 497 22. Morin J-FG, Afzali MH, Bourque J, Stewart SH, Séguin JR, O’Leary-Barrett M, et al. A  
498 population-based analysis of the relationship between substance use and adolescent  
499 cognitive development. *Am J Psychiatry*. 2018;176(2):98–106.
- 500 23. Slotkin TA. Nicotine and the adolescent brain: insights from an animal model.  
501 *Neurotoxicol Teratol*. 2002;24(3):369–84.
- 502 24. Azam L, Chen Y, Leslie FM. Developmental regulation of nicotinic acetylcholine  
503 receptors within midbrain dopamine neurons. *Neuroscience*. 2007;144(4):1347–60.
- 504 25. Fried PA, Watkinson B, Gray R. Neurocognitive consequences of cigarette smoking in  
505 young adults--a comparison with pre-drug performance. *Neurotoxicol Teratol*.  
506 2006;28(4):517–25.
- 507 26. Weiser M, Zarka S, Werbeloff N, Kravitz E, Lubin G. Cognitive test scores in male  
508 adolescent cigarette smokers compared to non-smokers: a population-based study.  
509 *Addiction*. 2010;105(2):358–63.
- 510 27. Chen K, Kandel D. The natural history of drug use from adolescence to the mid-  
511 thirties in a general population sample. *Am J Public Health*. 1995;85(1):41–7.

- 512 28. Degenhardt L, Chiu W-T, Sampson N, Kessler RC, Anthony JC, Angermeyer M, et al.  
513 Toward a global view of alcohol, tobacco, cannabis, and cocaine use: findings from  
514 the WHO World Mental Health Surveys. *PLoS Med.* 2008;5(7):e141–e141.
- 515 29. Lubke GH, Muthén B. Investigating population heterogeneity with factor mixture  
516 models. *Psychol Methods.* 2005;10(1):21–39.
- 517 30. Lawlor D, Richmond R, Warrington N, McMahon G, Davey Smith G, Bowden J, et al.  
518 Using Mendelian randomization to determine causal effects of maternal pregnancy  
519 (intrauterine) exposures on offspring outcomes: Sources of bias and methods for  
520 assessing them. *Wellcome open Res.* 2017;2:11.
- 521 31. Boyd A, Golding J, Macleod J, Lawlor DA, Fraser A, Henderson J, et al. Cohort Profile:  
522 the 'children of the 90s'--the index offspring of the Avon Longitudinal Study of  
523 Parents and Children. *Int J Epidemiol.* 2013;42(1):111–27.
- 524 32. Fraser A, Macdonald-Wallis C, Tilling K, Boyd A, Golding J, Davey Smith G, et al.  
525 Cohort Profile: the Avon Longitudinal Study of Parents and Children: ALSPAC mothers  
526 cohort. *Int J Epidemiol.* 2013;42(1):97–110.
- 527 33. Northstone K, Lewcock M, Groom A, Boyd A, Macleod J, Timpson N, et al. The Avon  
528 Longitudinal Study of Parents and Children (ALSPAC ): an update on the enrolled  
529 sample of index children in 2019. *Wellcome Open Res.* 2019;4:51.
- 530 34. Howe LJ, Trela-Larsen L, Taylor M, Heron J, Munafo MR, Taylor AE. Body mass index,  
531 body dissatisfaction and adolescent smoking initiation. *Drug Alcohol Depend.* 2017  
532 Sep;178:143–9.
- 533 35. Taylor M, Collin SM, Munafo MR, MacLeod J, Hickman M, Heron J. Patterns of  
534 cannabis use during adolescence and their association with harmful substance use  
535 behaviour: findings from a UK birth cohort. *J Epidemiol Community Health.* 2017

- 536 Aug;71(8):764–70.
- 537 36. Harris PA, Taylor R, Thielke R, Payne J, Gonzalez N, Conde JG. Research electronic  
538 data capture (REDCap)--a metadata-driven methodology and workflow process for  
539 providing translational research informatics support. *J Biomed Inform.*  
540 2009;42(2):377–81.
- 541 37. Harris PA, Taylor R, Minor BL, Elliott V, Fernandez M, Neal LO, et al. The REDCap  
542 consortium: Building an international community of software platform partners. *J*  
543 *Biomed Inform.* 2019;95(5):103208.
- 544 38. Kirchner WK. Age differences in short-term retention of rapidly changing information.  
545 *J Exp Psychol.* 1958;55(4):352–8.
- 546 39. Wardle MC, de Wit H, Penton-Voak I, Lewis G, Munafò MR. Lack of association  
547 between COMT and working memory in a population-based cohort of healthy young  
548 adults. *Neuropsychopharmacology.* 2013;38(7):1253–63.
- 549 40. Rossi R, Zammit S, Button KS, Munafò MR, Lewis G, David AS. Psychotic experiences  
550 and working memory: a population-based study using signal-detection analysis. *PLoS*  
551 *One.* 2016;11(4):e0153148–e0153148.
- 552 41. Mahedy L, Field M, Gage S, Hammerton G, Heron J, Hickman M, et al. Alcohol use in  
553 adolescence and later working memory: Findings from a large population-based birth  
554 cohort. *Alcohol Alcohol.* 2018;53:251–8.
- 555 42. Logan GD, Cowan WB, Davis KA. On the ability to inhibit simple and choice reaction  
556 time responses: a model and a method. *J Exp Psychol Hum Percept Perform.*  
557 1984;10(2):276–91.
- 558 43. Band GPH, van der Molen MW, Logan GD. Horse-race model simulations of the stop-  
559 signal procedure. *Acta Psychol (Amst).* 2003;112(2):105–42.



- 560 44. Penton-Voak IS, Bate H, Lewis G, Munafo MR. Effects of emotion perception training  
561 on mood in undergraduate students: randomised controlled trial. *Br J Psychiatry*.  
562 2012;201(1):71–2.
- 563 45. Bolck A, Croon M, Hagenars J. Estimating latent structure models with categorical  
564 variables: one-step versus three-step estimators. *Polit Anal*. 2004;12(1):3–27.
- 565 46. Muthén LK, Muthén BO. *User’s Guide*. 7th ed. Muthén LK, Muthén BO, editors. Los  
566 Angeles, CA: Muthén & Muthén; 2016.
- 567 47. Pasma JA, Verweij KJH, Gerring Z, Stringer S, Sanchez-Roige S, Treur JL, et al. GWAS  
568 of lifetime cannabis use reveals new risk loci, genetic overlap with psychiatric traits,  
569 and a causal influence of schizophrenia. *Nat Neurosci*. 2018;21(9):1161–70.
- 570 48. Mahedy L, Suddell S, Skirrow C, Wootton R, Fernandes GS, Heron J, et al. Alcohol use  
571 and cognitive functioning in young adults: an observational and Mendelian  
572 randomisation study. *medRxiv*. 2019;19003327.
- 573 49. Hemani G, Zheng J, Elsworth B, Wade KH, Haberland V, Baird D, et al. The MR-Base  
574 platform supports systematic causal inference across the human phenome. *Elife*.  
575 2018 May;7.
- 576 50. Bowden J, Davey Smith G, Burgess S. Mendelian randomization with invalid  
577 instruments: effect estimation and bias detection through Egger regression. *Int J*  
578 *Epidemiol*. 2015;44(2):512–25.
- 579 51. Bowden J, Davey Smith G, Haycock PC, Burgess S. Consistent estimation in Mendelian  
580 randomization with some invalid instruments using a weighted median estimator.  
581 *Genet Epidemiol*. 2016;40(4):304–14.
- 582 52. Hartwig FP, Davey Smith G, Bowden J. Robust inference in summary data Mendelian  
583 randomization via the zero modal pleiotropy assumption. *Int J Epidemiol*.

- 584 2017;46(6):1985–98.
- 585 53. Brion M-JA, Shakhbazov K, Visscher PM. Calculating statistical power in Mendelian  
586 randomization studies. *Int J Epidemiol*. 2012;42(5):1497–501.
- 587 54. Fontes MA, Bolla KI, Cunha PJ, Almeida PP, Jungerman F, Laranjeira RR, et al.  
588 Cannabis use before age 15 and subsequent executive functioning. *Br J Psychiatry*.  
589 2011;198(6):442–7.
- 590 55. Gruber SA, Dahlgren MK, Sagar KA, Gonenc A, Killgore WDS. Age of onset of  
591 marijuana use impacts inhibitory processing. *Neurosci Lett*. 2012;511(2):89–94.
- 592 56. Mashhoon Y, Betts J, Farmer SL, Lukas SE. Early onset tobacco cigarette smokers  
593 exhibit deficits in response inhibition and sustained attention. *Drug Alcohol Depend*.  
594 2018;184:48–56.
- 595 57. Goriounova NA, Mansvelder HD. Short- and long-term consequences of nicotine  
596 exposure during adolescence for prefrontal cortex neuronal network function. *Cold  
597 Spring Harb Perspect Med*. 2012;2(12):a012120–a012120.
- 598 58. Mokrysz C, Freeman TP, Korkki S, Griffiths K, Curran H V. Are adolescents more  
599 vulnerable to the harmful effects of cannabis than adults? A placebo-controlled study  
600 in human males. *Transl Psychiatry*. 2016;6(11):e961–e961.
- 601 59. Boccio CM, Beaver KM. Examining the influence of adolescent marijuana use on adult  
602 intelligence: Further evidence in the causation versus spuriousness debate. *Drug  
603 Alcohol Depend*. 2017;177:199–206.
- 604 60. Wolke D, Waylen A, Samara M, Steer C, Goodman R, Ford T, et al. Selective drop-out  
605 in longitudinal studies and non-biased prediction of behaviour disorders. *Br J  
606 Psychiatry*. 2009;195(3):249–56.
- 607 61. Boykan R, Messina CR, Chateau G, Eliscu A, Tolentino J, Goniewicz ML. Self-reported

- 608 use of tobacco, E-cigarettes, and marijuana versus urinary biomarkers. *Pediatrics*.  
609 2019;143(5).
- 610 62. Bray BC, Lanza ST, Tan X. Eliminating bias in classify-analyze approaches for latent  
611 class analysis. *Struct Equ Model*. 2015;22(1):1–11.
- 612 63. Davies NM, Holmes M V, Davey Smith G. Reading Mendelian randomisation studies: a  
613 guide, glossary, and checklist for clinicians. *BMJ*. 2018;362:k601.
- 614 64. Cousijn J, Wiers RW, Ridderinkhof KR, van den Brink W, Veltman DJ, Goudriaan AE.  
615 Effect of baseline cannabis use and working-memory network function on changes in  
616 cannabis use in heavy cannabis users: A prospective fMRI study. *Hum Brain Mapp*.  
617 2014;35(5):2470–82.
- 618 65. Squeglia LM, Jacobus J, Nguyen-Louie TT, Tapert SF. Inhibition during early  
619 adolescence predicts alcohol and marijuana use by late adolescence.  
620 *Neuropsychology*. 2014;28(5):782–90.
- 621 66. Anokhin AP, Golosheykin S. Neural Correlates of Response Inhibition in Adolescents  
622 Prospectively Predict Regular Tobacco Smoking. *Dev Neuropsychol*. 2016;41(1–2):22–  
623 37.
- 624

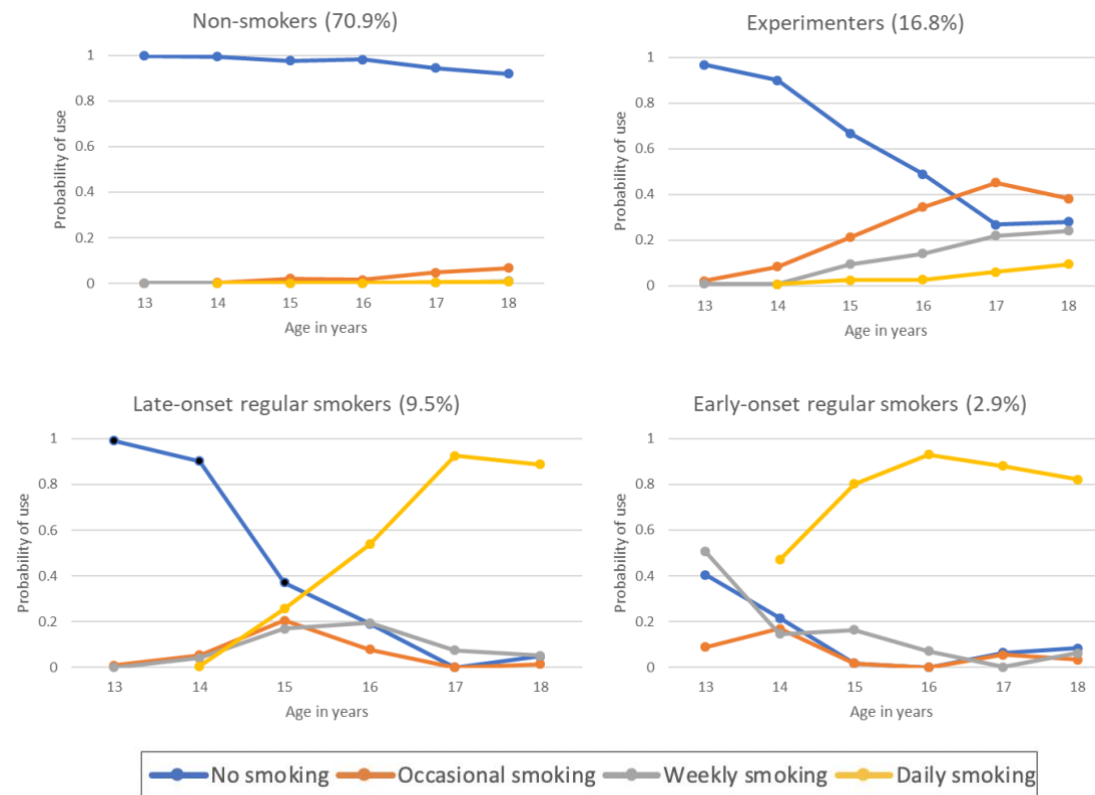

**Figure 1a.** Distribution of tobacco use across latent classes at each timepoint ( $n=8,525$ ). Class proportions based on estimated posterior probability<sup>1</sup>.

<sup>1</sup> Tobacco use at age 13 was omitted from the figure as 'daily smoking' was not recorded at this age. Overall, the 'non-users' reported a low probability of tobacco use across all measurement occasions; 'experimenters' were mostly characterised by smoking on the later measurement occasions only; 'late-onset regular' smokers were mostly characterised by smoking on a daily basis in the later measurement occasions only; while 'early-onset regular' smokers were mostly characterised by smoking on a daily basis across timepoints from age 14 years onwards.

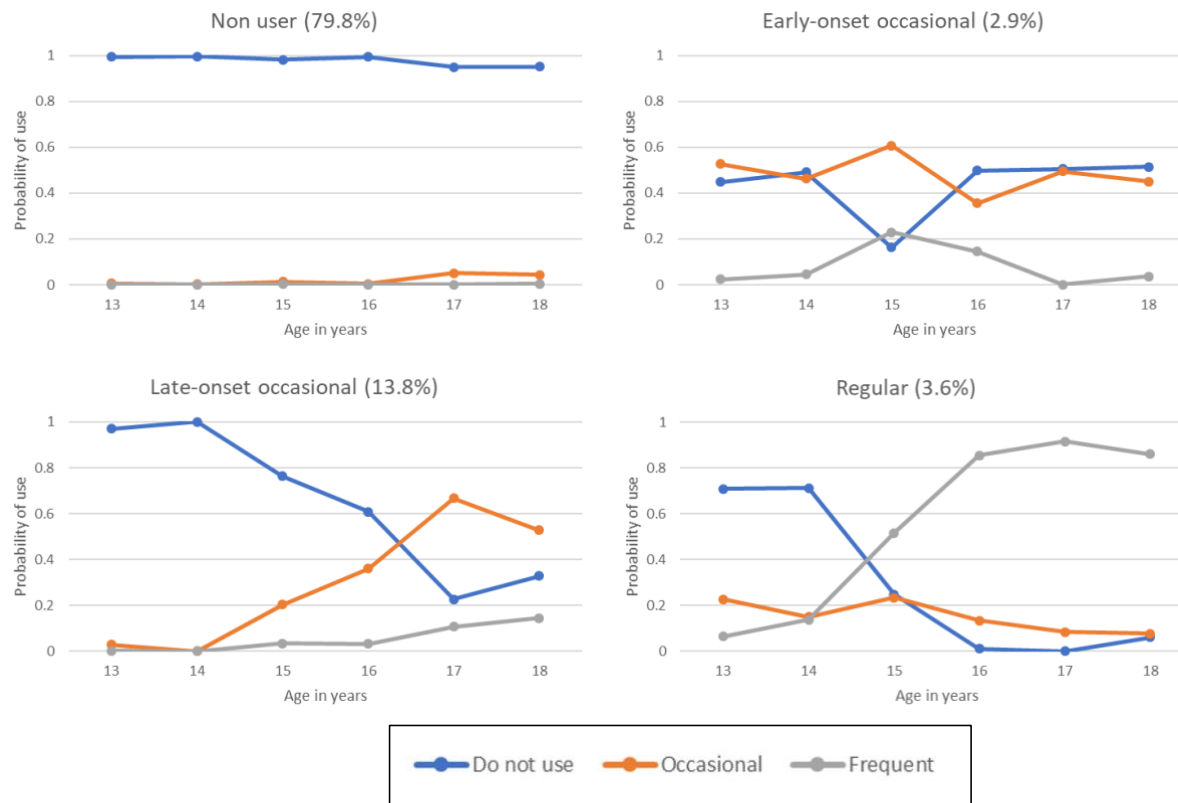

**Figure 1b.** Distribution of cannabis use across latent classes at each timepoint ( $n=8,093$ ). Class proportions based on estimated posterior probability<sup>2</sup>.

<sup>2</sup> The 'non users' reported a low probability of cannabis use across all measurement occasions; 'late-onset occasional' cannabis users were mostly characterised by cannabis use on the later measurement occasions only; 'early-onset occasional' cannabis users were mostly characterised by occasional cannabis use across all measurements; while 'regular cannabis users' were mostly characterised by cannabis use across timepoints with increasing involvement from age 15 years onwards.

**Table 1a.** Smoking patterns from 13 to 18 years and working memory at age 24 (higher  $d'$  scores reflect better performance)

|                               | No smoking      | Experimenter       | Late-onset regular   | Early-onset regular  |                     |
|-------------------------------|-----------------|--------------------|----------------------|----------------------|---------------------|
| $n=3,232$ for all models      | Reference group | $b$ (95% CI)       | $b$ (95% CI)         | $b$ (95% CI)         | Wald (df) $p$ value |
| <b>Unadjusted models</b>      |                 |                    |                      |                      |                     |
| Working memory $d'$           | -               | 0.01 (-0.10, 0.10) | -0.32 (-0.48, -0.16) | -0.50 (-0.89, -0.10) | 28.92 (3) $p<0.001$ |
| <b>Adjusted for SES</b>       |                 |                    |                      |                      |                     |
| Working memory $d'$           | -               | 0.00 (-0.11, 0.11) | -0.28 (-0.44, -0.12) | -0.39 (-0.78, 0.01)  | 19.78 (3) $p<0.001$ |
| <b>Adjusted for SES/WM/HI</b> |                 |                    |                      |                      |                     |
| Working memory $d'$           | -               | 0.01 (-0.10, 0.11) | -0.27 (-0.43, -0.11) | -0.42 (-0.81, -0.02) | 20.25 (3) $p<0.001$ |
| <b>Fully adjusted models</b>  |                 |                    |                      |                      |                     |
| Working memory $d'$           | -               | 0.01 (-0.12, 0.10) | -0.29 (-0.45, -0.13) | -0.45 (-0.84, -0.05) | 22.12 (3) $p<0.001$ |

Note. SES: socioeconomic status; WM: working memory at age ~11 years; HI: head injury/ unconsciousness up to age 11 years; Wald tests determine whether there were differences between patterns of tobacco use and subsequent cognitive functioning; negative estimates indicate poorer performance

**Table 1b.** Patterns of cannabis use from 13 to 18 years and working memory at age 24 (lower  $d'$  reflect poorer performance)

|                               | Non-user        | Late-onset occasional | Early-onset occasional | Early-onset regular  |                     |
|-------------------------------|-----------------|-----------------------|------------------------|----------------------|---------------------|
| $n=3,232$ for all models      | Reference group | $b$ (95% CI)          | $b$ (95% CI)           | $b$ (95% CI)         | Wald (df) $p$ value |
| <b>Unadjusted models</b>      |                 |                       |                        |                      |                     |
| Working memory $d'$           | -               | -0.01 (-0.13, 0.12)   | 0.24 (-0.05, 0.52)     | -0.58 (-0.90, -0.26) | 14.10 (3) $p=0.003$ |
| <b>Adjusted for SES</b>       |                 |                       |                        |                      |                     |
| Working memory $d'$           | -               | -0.06 (-0.18, 0.07)   | 0.17 (-0.11, 0.45)     | -0.60 (-0.91, -0.30) | 16.26 (3) $p<0.001$ |
| <b>Adjusted for SES/WM/HI</b> |                 |                       |                        |                      |                     |
| Working memory $d'$           | -               | -0.09 (-0.21, 0.04)   | 0.15 (-0.12, 0.43)     | -0.60 (-0.91, -0.30) | 17.64 (3) $p<0.001$ |
| <b>Fully adjusted models</b>  |                 |                       |                        |                      |                     |
| Working memory $d'$           | -               | -0.10 (-0.22, 0.03)   | 0.12 (-0.17, 0.41)     | -0.62 (-0.93, -0.31) | 18.56 (3) $p<0.001$ |

Note. SES: socioeconomic status; WM: working memory at age ~11 years; HI: head injury/ unconsciousness up to age 11 years; Wald tests determine whether there were differences between patterns of tobacco use and subsequent cognitive functioning; negative estimates indicate poorer performance

**Table 2a.** Smoking patterns from 13 to 18 years and response inhibition at age 24 (shorter reaction times reflect better performance)

|                                | No smoking      | Experimenter       | Late-onset regular | Early-onset regular |                           |
|--------------------------------|-----------------|--------------------|--------------------|---------------------|---------------------------|
| <i>n</i> =3,232 for all models | Reference group | <i>b</i> (95% CI)  | <i>b</i> (95% CI)  | <i>b</i> (95% CI)   | Wald (df) <i>p</i> value  |
| <b>Unadjusted models</b>       |                 |                    |                    |                     |                           |
| Stop signal reaction time      | -               | 0.02 (-0.05, 0.09) | 0.19 (-0.02, 0.40) | 0.21 (0.10, 0.31)   | 22.73 (3) <i>p</i> <0.001 |
| <b>Adjusted for SES</b>        |                 |                    |                    |                     |                           |
| Stop signal reaction time      | -               | 0.01 (-0.06, 0.09) | 0.08 (-0.13, 0.30) | 0.18 (0.07, 0.28)   | 13.04 (3) <i>p</i> =0.005 |
| <b>Adjusted for SES/WM/HI</b>  |                 |                    |                    |                     |                           |
| Stop signal reaction time      | -               | 0.01 (-0.06, 0.08) | 0.10 (-0.12, 0.32) | 0.17 (0.07, 0.27)   | 13.05 (3) <i>p</i> =0.005 |
| <b>Fully adjusted model</b>    |                 |                    |                    |                     |                           |
| Stop signal reaction time      | -               | 0.01 (-0.06, 0.09) | 0.10 (-0.12, 0.32) | 0.18 (0.07, 0.28)   | 12.78 (3) <i>p</i> =0.005 |

Note. SES: socioeconomic status; WM: working memory at age ~11 years; HI: head injury/ unconsciousness up to age 11 years; Wald tests determine whether there were differences between patterns of tobacco use and subsequent cognitive functioning; positive estimates indicate poorer performance



**Table 2b.** Patterns of cannabis use from 13 to 18 years and response inhibition at age 24 (longer reaction times reflect poorer performance)

|                                | Non-user        | Late-onset occasional | Early-onset occasional | Early-onset regular |                          |
|--------------------------------|-----------------|-----------------------|------------------------|---------------------|--------------------------|
| <i>n</i> =3,232 for all models | Reference group | <i>b</i> (95% CI)     | <i>b</i> (95% CI)      | <i>b</i> (95% CI)   | Wald (df) <i>p</i> value |
| <b>Unadjusted models</b>       |                 |                       |                        |                     |                          |
| Stop signal reaction time      | -               | 0.00 (-0.07, 0.08)    | 0.03 (-0.13, 0.18)     | 0.29 (0.06, 0.52)   | 7.02 (3) <i>p</i> =0.07  |
| <b>Adjusted for SES</b>        |                 |                       |                        |                     |                          |
| Stop signal reaction time      | -               | 0.02 (-0.06, 0.10)    | 0.04 (-0.13, 0.20)     | 0.30 (0.07, 0.52)   | 8.03 (3) <i>p</i> =0.04  |
| <b>Adjusted for SES/WM/HI</b>  |                 |                       |                        |                     |                          |
| Stop signal reaction time      | -               | 0.04 (-0.04, 0.11)    | 0.04 (-0.12, 0.21)     | 0.30 (0.08, 0.52)   | 9.25 (3) <i>p</i> =0.02  |
| <b>Fully adjusted model</b>    |                 |                       |                        |                     |                          |
| Stop signal reaction time      | -               | 0.04 (-0.04, 0.11)    | 0.05 (-0.11, 0.22)     | 0.30 (0.08, 0.52)   | 9.24 (3) <i>p</i> =0.02  |

Note. SES: socioeconomic status; WM: working memory at age ~11 years; HI: head injury/ unconsciousness up to age 11 years; Wald tests determine whether there were differences between patterns of tobacco use and subsequent cognitive functioning; negative estimates indicate poorer performance

**Table 3a.** Smoking patterns from 13 to 18 and emotion recognition at age 24 (lower scores reflect poorer performance)

|                                | No smoking      | Experimenter        | Late-onset regular   | Early-onset regular  |                           |
|--------------------------------|-----------------|---------------------|----------------------|----------------------|---------------------------|
| <i>n</i> =3,232 for all models | Reference group | <i>b</i> (95% CI)   | <i>b</i> (95% CI)    | <i>b</i> (95% CI)    | Wald (df) <i>p</i> value  |
| <b>Unadjusted models</b>       |                 |                     |                      |                      |                           |
| Total hits                     | -               | 0.00 (-0.01, 0.01)  | -0.02 (-0.04, -0.01) | -0.05 (-0.08, -0.01) | 20.32 (3) <i>p</i> <0.001 |
| <b>Adjusted for SES</b>        |                 |                     |                      |                      |                           |
| Total hits                     | -               | -0.00 (-0.01, 0.01) | -0.02 (-0.03, -0.00) | -0.04 (-0.07, -0.01) | 14.45 (3) <i>p</i> =0.002 |
| <b>Adjusted for SES/WM/HI</b>  |                 |                     |                      |                      |                           |
| Total hits                     | -               | -0.00 (-0.01, 0.01) | -0.02 (-0.03, -0.00) | -0.04 (-0.08, -0.01) | 14.65 (3) <i>p</i> =0.002 |
| <b>Fully adjusted model</b>    |                 |                     |                      |                      |                           |
| Total hits                     | -               | -0.00 (-0.01, 0.01) | -0.02 (-0.03, -0.00) | -0.04 (-0.08, -0.01) | 16.43 (3) <i>p</i> =0.001 |

Note. SES: socioeconomic status; WM: working memory at age ~11 years; HI: head injury/ unconsciousness up to age 11 years; Wald tests determine whether there were differences between patterns of tobacco use and subsequent cognitive functioning; negative estimates indicate poorer performance

**Table 3b.** Patterns of cannabis use from 13 to 18 and emotion recognition at age 24 (higher scores reflect better performance)

|                                | Non-user        | Late-onset occasional | Early-onset occasional | Early-onset regular |                          |
|--------------------------------|-----------------|-----------------------|------------------------|---------------------|--------------------------|
| <i>n</i> =3,232 for all models | Reference group | <i>b</i> (95% CI)     | <i>b</i> (95% CI)      | <i>b</i> (95% CI)   | Wald (df) <i>p</i> value |
| <b>Unadjusted models</b>       |                 |                       |                        |                     |                          |
| Total hits                     | -               | 0.00 (-0.01, 0.02)    | 0.03 (0.00, 0.06)      | -0.03 (-0.06, 0.00) | 7.71 (3) <i>p</i> =0.05  |
| <b>Adjusted for SES</b>        |                 |                       |                        |                     |                          |
| Total hits                     | -               | 0.00 (-0.01, 0.01)    | 0.03 (0.00, 0.05)      | -0.02 (-0.05, 0.01) | 4.68 (3) <i>p</i> =0.20  |
| <b>Adjusted for SES/WM/HI</b>  |                 |                       |                        |                     |                          |
| Total hits                     | -               | -0.00 (-0.01, 0.01)   | 0.03 (-0.00, 0.05)     | -0.02 (-0.05, 0.01) | 4.50 (3) <i>p</i> =0.21  |
| <b>Fully adjusted model</b>    |                 |                       |                        |                     |                          |
| Total hits                     | -               | -0.00 (-0.01, 0.01)   | 0.02 (-0.00, 0.05)     | -0.02 (-0.05, 0.01) | 4.23 (3) <i>p</i> =0.24  |

Note. SES: socioeconomic status; WM: working memory at age ~11 years; HI: head injury/ unconsciousness up to age 11 years; Wald tests determine whether there were differences between patterns of tobacco use and subsequent cognitive functioning; negative estimates indicate poorer performance

**Table S4a.** Two-sample MR analyses of the effects of smoking initiation on cognitive functioning (unstandardized coefficients)

| <b>Exposure</b>           | <b>Outcome</b>             | <b>Method</b>             | <b>N SNPs</b> | <b>Beta (95% CI)</b> | <b>P-value</b> |
|---------------------------|----------------------------|---------------------------|---------------|----------------------|----------------|
| <b>Smoking initiation</b> | <b>Working memory</b>      | Inverse-Variance Weighted | 341           | 0.01 (-0.06, 0.29)   | 0.21           |
|                           |                            | MR Egger (SIMEX)          | 341           | -0.68 (-1.41, 0.06)  | 0.07           |
|                           |                            | Weighted Median           | 341           | 0.06 (-0.21, 0.32)   | 0.65           |
|                           |                            | Weighted Mode             | 341           | -0.32 (-1.11, 0.48)  | 0.43           |
| <b>Smoking initiation</b> | <b>Response inhibition</b> | Inverse-Variance Weighted | 341           | 0.16 (-0.03, 0.35)   | 0.10           |
|                           |                            | MR Egger (SIMEX)          | 341           | 1.30 (-2.22, 0.03)   | 0.02           |
|                           |                            | Weighted Median           | 341           | 0.21 (-0.07, 0.49)   | 0.14           |
|                           |                            | Weighted Mode             | 341           | 0.30 (-0.55, 1.16)   | 0.49           |
| <b>Smoking initiation</b> | <b>Emotion recognition</b> | Inverse-Variance Weighted | 341           | 0.00 (-0.18, 0.18)   | 0.97           |
|                           |                            | MR Egger (SIMEX)          | 341           | 0.04 (-0.71, 0.79)   | 0.91           |
|                           |                            | Weighted Median           | 341           | -0.05 (-0.31, 0.21)  | 0.68           |
|                           |                            | Weighted Mode             | 341           | -0.19 (-1.04, 0.67)  | 0.67           |

**Table S4b.** Two-sample MR analyses of the effects of lifetime cannabis use on cognitive functioning (unstandardized coefficients)

| <b>Exposure</b>              | <b>Outcome</b>             | <b>Method</b>             | <b>N SNPs</b> | <b>Beta (95% CI)</b> | <b>P-value</b> |
|------------------------------|----------------------------|---------------------------|---------------|----------------------|----------------|
| <b>Lifetime cannabis use</b> | <b>Working memory</b>      | Inverse-Variance Weighted | 8             | -0.37 (-0.72, -0.02) | 0.04           |
|                              |                            | MR Egger (SIMEX)          | 8             | -0.10 (-0.21, 0.03)  | 0.17           |
|                              |                            | Weighted Median           | 8             | -0.38 (-0.81, 0.06)  | 0.09           |
|                              |                            | Weighted Mode             | 8             | -0.21 (-0.85, 0.43)  | 0.55           |
| <b>Lifetime cannabis use</b> | <b>Response inhibition</b> | Inverse-Variance Weighted | 8             | 0.04 (-0.32, 0.39)   | 0.85           |
|                              |                            | MR Egger (SIMEX)          | 8             | 0.50 (-0.22, 0.02)   | 0.32           |
|                              |                            | Weighted Median           | 8             | 0.22 (-0.24, 0.68)   | 0.35           |
|                              |                            | Weighted Mode             | 8             | 0.26 (-0.35, 0.87)   | 0.43           |
| <b>Lifetime cannabis use</b> | <b>Emotion recognition</b> | Inverse-Variance Weighted | 8             | -0.08 (-0.52, 0.36)  | 0.71           |
|                              |                            | MR Egger (SIMEX)          | 8             | 0.06 (-0.22, 0.03)   | 0.93           |
|                              |                            | Weighted Median           | 8             | 0.02 (-0.46, 0.48)   | 0.95           |
|                              |                            | Weighted Mode             | 8             | 0.01 (-0.67, 0.69)   | 0.98           |

**Table 5.** One-sample MR analyses of the effects of smoking initiation on cognitive functioning (standardised coefficients)

|                              | $\beta$ | se   | 95% CI      | $p$  | F statistic |
|------------------------------|---------|------|-------------|------|-------------|
| <b>Smoking initiation</b>    |         |      |             |      |             |
| Working memory               | -0.38   | 0.58 | -1.51, 0.75 | 0.51 | 14.63       |
| Response inhibition          | -0.27   | 0.53 | -1.31, 0.77 | 0.61 | 18.12       |
| Emotion recognition          | -0.53   | 0.54 | -1.59, 0.53 | 0.33 | 17.57       |
| <b>Lifetime cannabis use</b> |         |      |             |      |             |
| Working memory               | -1.41   | 0.97 | -3.31, 0.49 | 0.14 | 6.70        |
| Response inhibition          | 0.02    | 0.68 | -1.31, 1.35 | 0.98 | 8.87        |
| Emotion recognition          | -0.04   | 0.69 | -1.35, 1.27 | 0.95 | 8.79        |
